# Supplementary material
Source: PubMed Central journal article supplement (PMC9510452)
Supplement: 12562_2022_1630_MOESM1_ESM.pdf [file 12562_2022_1630_MOESM1_ESM.pdf]

## General information

We are collecting data to understand the impact that COVID-19 has had on aquaculture in Bangladesh. To assist us, we would be grateful if you could answer the questions as honestly as possible. Please be sure that all responses are treated in confidence and any results from the data will be aggregated and anonymized.

---

\* Required

1. Farmer name \*

---

2. Farm address (Village, Union, Sub-district, District) \*

---

3. GPS location \*

---

4. Farm size (decimal) \*

---

5. Number of total ponds \*

---

6. Cultured species \*

---

---

---

---

---

7. What finfish species did you co-culture before COVID?

---

8. What finfish species do you co-culture after COVID?

---

---

---

---

---

9. What is the main market for produce? \*

*Mark only one oval.*

- Local markets
- Purchased by middleman
- Purchased by product manufacturer
- Export
- Other: \_\_\_\_\_

Farm Bio-  
security

In this section we would like to understand the current biosecurity practices used on the farm.

10. Do you follow the national bio-security policy? \*

*Mark only one oval.*

Yes

No

11. Is there any restriction to access the farm site? \*

*Mark only one oval.*

Yes

No

12. Is there foot bath facility at the entry of farm premises? \*

*Mark only one oval.*

Yes

No

13. Is there foot bath facility at the entry of pond premises? \*

*Mark only one oval.*

Yes

No

14. Do you record daily mortality number? \*

*Mark only one oval.*

Yes

No

#### Effect of Covid19 on staffing

15. Number of permanent staff employed before Covid19 \*

---

16. Labour cost of permanent staff employed before Covid19 (BDT) \*

---

17. Number of permanent staff employed after Covid19 \*

---

18. Labour cost of permanent staff employed after Covid19 (BDT) \*

---

19. Number of seasonal staff employed before Covid19 \*

---

20. Labour cost of seasonal staff employed before Covid19 (BDT) \*

---

21. Number of seasonal staff employed after Covid19 \*

---

22. Labour cost of seasonal staff employed after Covid19 (BDT) \*

---

23. Number of non-aquaculture staff employed before Covid19 \*

---

24. Labour cost of non-aquaculture staff employed before Covid19 (BDT) \*

---

25. Number of non-aquaculture staff employed after Covid19

---

26. Labour cost of non-aquaculture staff employed after Covid19 (BDT) \*

---

Covid19 effect on farm economy (Fixed cost)

27. Pond construction cost (BDT) \*

---

28. Electricity cost (BDT) \*

---

29. Water supply cost (BDT) \*

---

30. Fencing cost (BDT) \*

---

31. Nets and others (BDT) \*

---

32. Farm house cost (BDT) \*

---

Covid19 effect on farm economy (Operational cost)

33. Land lease cost before Covid19 (BDT) \*

---

34. Land lease cost after Covid19 (BDT) \*

---

35. Pond preparation cost in each cycle before Covid19 (BDT) \*

---

36. Pond preparation cost in each cycle after Covid19 (BDT) \*

---

37. Water supply cost in each cycle before Covid19 (BDT) \*

---

38. Water supply cost in each cycle after Covid19 (BDT) \*

---

39. Seed cost in each cycle before Covid19 (BDT) \*

---

40. Seed cost in each cycle after Covid19 (BDT) \*

---

41. Feed cost in each cycle before Covid19 (BDT) \*

---

42. Feed cost in each cycle after Covid19 (BDT) \*

---

43. Labour cost in each cycle before Covid19 (BDT) \*

---

44. Labour cost in each cycle after Covid19 (BDT) \*

---

45. Electricity cost in each cycle before Covid19 (BDT) \*

---

46. Electricity cost in each cycle after Covid19 (BDT) \*

---

47. Drugs and medicine cost in each cycle before Covid19 (BDT) \*

---

48. Drugs and medicine cost in each cycle after Covid19 (BDT) \*

---

49. Harvesting and transport cost in each cycle before Covid19 (BDT) \*

---

50. Harvesting and transport cost in each cycle after Covid19 (BDT) \*

---

Covid19 effect on farm economy (Net returns)

51. Production per decimal obtained for each species before Covid19 (kg) \*

---

---

---

---

---



52. Production per decimal obtained for each species after Covid19 (kg) \*

---

---

---

---

---

53. Price per kg obtained for each species before Covid19

---

---

---

---

---

54. Price per kg obtained for each species after Covid19

---

---

This content is neither created nor endorsed by Google.

Google Forms
