# Supplementary material
Source: PubMed Central journal article supplement (PMC9510452)
Supplement: 12562_2022_1630_MOESM2_ESM.pdf [file 12562_2022_1630_MOESM2_ESM.pdf]

## CovShrimp Consumer Response

We are collecting data to understand the impact that COVID-19 has had on aquaculture in Bangladesh. To assist us, we would be grateful if you could answer the questions as honestly as possible. Please be sure that all responses are treated in confidence and any results from the data will be aggregated and anonymized.

---

\* Required

1. Market code \*

*Mark only one oval.*

M 01

M 02

M 03

2. 1. Name \*

\_\_\_\_\_

3. 2. Age \*

\_\_\_\_\_

4. 3. Gender \*

*Mark only one oval.*

Female

Male

Prefer not to say

Other: \_\_\_\_\_

5. 4. Address (Village, Post office, Upazilla, District) \*

---

---

---

---

---

6. 5. Educational qualification \*

*Mark only one oval.*

- Primary
- Secondary
- Higher education (University)
- Other: \_\_\_\_\_

7. 6. Employment type of the respondent \*

*Mark only one oval.*

- Government employee
- Non-government employee
- Business man
- Days man
- Other: \_\_\_\_\_

8. 7. Monthly income (Thousand) \*

*Mark only one oval.*

- Less than 10,000 BDT
- 10,000 - 30,000 BDT
- 30,000 - 50,000 BDT
- 50,000 - 80,000 BDT
- More than 80,000 BDT

Food preference as main protein source

9. 8. Which of the following foods was the main source of protein for your family PRE-COVID? \*

*Check all that apply.*

- Other salt water finfish (For example - Vhetki, Parshe)
- Other fresh water finfish (Fro example - Pangasius, Tilapia, Carps)
- Bagda (Shrimp)
- Golda (Prawn)
- Chicken
- Beef
- Egg
- Dairy products
- Other: \_\_\_\_\_

10. 9. Which of the following foods was the main source of protein for your family POST-COVID? \*

*Check all that apply.*

- Other saltwater finfish (For example - Vhetki, Parshe)
- Other fresh water finfish (Fro example - Pangasius, Tilapia, Carps)
- Bagda (Shrimp)
- Golda (Prawn)
- Chicken
- Beef
- Egg
- Dairy products
- Other: \_\_\_\_\_

*Skip to question 11*

Fish/Shrimp consumption (PRE-COVID)

11. 10. How often did your family consume other saltwater finfish (For example, Vhetki, Parshe etc) PRE-COVID? \*

*Mark only one oval.*

- Everyday
- On average 2-3 times a week
- Once every week
- Once a month
- Never

12. 11. How often did your family consume other freshwater finfish (For example, Pangasius, Tilapia, Carps etc) PRE-COVID? \*

*Mark only one oval.*

- Everyday
- On average 2-3 times a week
- Once every week
- Once a month
- Never

13. 12. How often did your family consume Bagda (Shrimp) PRE-COVID? \*

*Mark only one oval.*

- Everyday
- On average 2-3 times a week
- Once every week
- Once a month
- Never

14. 13. How often did your family consume Golda (Prawn) PRE-COVID? \*

*Mark only one oval.*

- Everyday
- On average 2-3 times a week
- Once every week
- Once a month
- Never

15. 14. Amount of other saltwater finfish (For example - Vhetki, Parshe etc.) usually you bought (in total) PRE-COVID (kg/week)

*Mark only one oval.*

- < 2 kg/week  
 2-5 kg/week  
 5-7 kg/week  
 7-10 kg/week  
 > 10 kg/week

16. 15. Amount of other freshwater finfish (For example - Pangasius, Tilapia, Carps etc.) usually you bought (in total) PRE-COVID (kg/week)

*Mark only one oval.*

- < 2 kg/week  
 2-5 kg/week  
 5-7 kg/week  
 7-10 kg/week  
 > 10 kg/week

17. 16. Amount of Bagda (Shrimp) usually you bought (in total) PRE-COVID (kg/week)

*Mark only one oval.*

- < 0.5 kg/week  
 0.5-1 kg/week  
 1-2 kg/week  
 2-3 kg/week  
 > 3 kg/week

18. 17. Amount of Golda (Prawn) usually you bought (in total) PRE-COVID (kg/week)

*Mark only one oval.*

< 0.5 kg/week

0.5-1 kg/week

1-2 kg/week

2-3 kg/week

> 3 kg/week

Fish/Shrimp consumption (POST-COVID)

19. 18. How often does your family consume other saltwater finfish (For example - Vhetki, Parshe) POST-COVID? \*

*Mark only one oval.*

Everyday

On average 2-3 times a week

Once every week

Once a month

Never

20. 19. If your consumption of fish has changed because of COVID-19 what were your reasons for changing? (please tick all that apply) \*

*Check all that apply.*

- Consumption has not changed
- Fish was too expensive to buy
- Fish was cheaper to buy
- Fish was less available
- Fish was more available
- Unable to prepare the fish due to lack of help
- More help was available to prepare the fish
- I think eating fish is more nutritious to help fight against COVID19
- I think eating fish boosts the immune system to help fight against COVID19
- Other (please use the comment box in the next question to explain this)

21. 20. If you choose "other" option in the previous question please explain it here

---

---

---

---

---

22. 21. How often does your family consume other freshwater finfish (For example - Pangasius, Tilapia, Carps etc) POST-COVID? \*

*Mark only one oval.*

- Everyday
- On average 2-3 times a week
- Once every week
- Once a month
- Never



23. 22. If your consumption of fish has changed because of COVID-19 what were your reasons for changing? (please tick all that apply) \*

*Check all that apply.*

- Consumption has not changed
- Fish was too expensive to buy
- Fish was cheaper to buy
- Fish was less available
- Fish was more available
- Unable to prepare the fish due to lack of help
- More help was available to prepare the fish
- I think eating fish is more nutritious to help fight against COVID19
- I think eating fish boosts the immune system to help fight against COVID19
- Other (please use the comment box in the next question to explain this)

24. 23. If you choose "other" option in the previous question please explain it here

---

---

---

---

---

25. 24. How often does your family consume Bagda (Shrimp) POST-COVID? \*

*Mark only one oval.*

- Everyday
- On average 2-3 times a week
- Once every week
- Once a month
- Never

26. 25. If your consumption of Bagda (Shrimp) has changed because of COVID-19 what were your reasons for changing? (please tick all that apply) \*

*Check all that apply.*

- Consumption has not changed
- Bagda (Shrimp) was too expensive to buy
- Bagda (Shrimp) was cheaper to buy
- Bagda (Shrimp) was less available
- Bagda (Shrimp) was more available
- Unable to prepare the Bagda (Shrimp) due to lack of help
- More help was available to prepare the Bagda (Shrimp)
- I think eating Bagda (Shrimp) is more nutritious to help fight against COVID19
- I think eating Bagda (Shrimp) boosts the immune system to help fight against COVID19
- Other (please use the comment box in the next question to explain this)

27. 26. If you choose "other" option in the previous question please explain it here

---

---

---

---

---

28. 27. How often does your family consume Golda (Prawn) POST-COVID? \*

*Mark only one oval.*

- Everyday
- On average 2-3 times a week
- Once every week
- Once a month
- Never

29. 28. If your consumption of Golda (Prawn) has changed because of COVID-19 what were your reasons for changing? (please tick all that apply) \*

*Check all that apply.*

- Consumption has not changed
- Golda (Prawn) was too expensive to buy
- Golda (Prawn) was cheaper to buy
- Golda (Prawn) was less available
- Golda (Prawn) was more available
- Unable to prepare the Golda (Prawn) due to lack of help
- More help was available to prepare the Golda (Prawn)
- I think eating Golda (Prawn) is more nutritious to help fight against COVID19
- I think eating Golda (Prawn) boosts the immune system to help fight against COVID19
- Other (please use the comment box in the next question to explain this)

30. 29. If you choose "other" option in the previous question please explain it here

---

---

---

---

---

31. 30. Amount of other saltwater finfish (For example -Vhetki, Parshe etc.) usually you bought (in total) POST-COVID

*Mark only one oval.*

- < 2 kg/week
- 2-5 kg/week
- 5-7 kg/week
- 7-10 kg/week
- > 10 kg/week

32. 31. Have you changed the species of other saltwater finfish (For example - Vhetki, \* Parshe etc.) that you bought due to COVID19 and if so why? (please tick all that apply)

*Check all that apply.*

- I have not changed the species of fish I buy
- I have changed the species because they are more available
- I have changed the species because they are cheaper
- I have changed the species because they are more nutritious
- I have changed the species because they are easier to prepare
- I have changed the species because they are better for the immune system
- Other (please use the comment box in the next question to explain this)

33. 32. If you choose "other" option in the previous question please explain it here

---

---

---

---

---

34. 33. Amount of other freshwater finfish (For example - Pangus, Tilapia, Carps etc.) usually you bought (in total) POST-COVID

*Mark only one oval.*

- < 2 kg/week
- 2-5 kg/week
- 5-7 kg/week
- 7-10 kg/week
- > 10 kg/week

35. 34. Have you changed the species of other saltwater finfish (For example - Pangus, Tilapia, Carps etc.) that you bought due to COVID19 and if so why? (please tick all that apply) \*

*Check all that apply.*

- I have not changed the species of fish I buy
- I have changed the species because they are more available
- I have changed the species because they are cheaper
- I have changed the species because they are more nutritious
- I have changed the species because they are easier to prepare
- I have changed the species because they are better for the immune system
- Other (please use the comment box in the next question to explain this)

36. 35. If you choose "other" option in the previous question please explain it here

---

---

---

---

---

37. 36. Amount of Bagda (Shrimp) usually you bought (in total) POST-COVID

*Mark only one oval.*

- < 0.5 kg/week
- 0.5-1 kg/week
- 1-2 kg/week
- 2-3 kg/week
- > 3 kg/week

38. 37. Have you changed the amount of Bagda (Shrimp) that you bought due to COVID19 and if so why? (please tick all that apply) \*

*Check all that apply.*

- I have not changed the species of fish I buy
- I have changed the species because they are more available
- I have changed the species because they are cheaper
- I have changed the species because they are more nutritious
- I have changed the species because they are easier to prepare
- I have changed the species because they are better for the immune system
- Other (please use the comment box in the next question to explain this)

39. 38. If you choose "other" option in the previous question please explain it here

---

---

---

---

---

40. 39. Amount of Golda (Prawn) usually you bought (in total) POST-COVID

*Mark only one oval.*

- < 0.5 kg/week
- 0.5-1 kg/week
- 1-2 kg/week
- 2-3 kg/week
- > 3 kg/week

41. 40. Have you changed the amount of Golda (Prawn) that you bought due to COVID19 and if so why? (please tick all that apply)

\*

*Check all that apply.*

- I have not changed the species of fish I buy
- I have changed the species because they are more available
- I have changed the species because they are cheaper
- I have changed the species because they are more nutritious
- I have changed the species because they are easier to prepare
- I have changed the species because they are better for the immune system
- Other (please use the comment box in the next question to explain this)

42. 41. If you choose "other" option in the previous question please explain it here

---

---

---

---

---

43. 42. Please indicate how often you purchased the following shrimps or prawns before COVID? \*

*Mark only one oval per row.*

|                                                                            | Regularly<br>(every week) | Occasionally<br>(every month) | Rarely (special<br>occasions) | Never                 |
|----------------------------------------------------------------------------|---------------------------|-------------------------------|-------------------------------|-----------------------|
| Other saltwater finfish<br>(For example - Vhetki,<br>Parshe etc.)          | <input type="radio"/>     | <input type="radio"/>         | <input type="radio"/>         | <input type="radio"/> |
| Other freshwater finfish<br>(For example - Pangus,<br>Tilapia, Carps etc.) | <input type="radio"/>     | <input type="radio"/>         | <input type="radio"/>         | <input type="radio"/> |
| Bagda (Shrimp)                                                             | <input type="radio"/>     | <input type="radio"/>         | <input type="radio"/>         | <input type="radio"/> |
| Golda (Prawn)                                                              | <input type="radio"/>     | <input type="radio"/>         | <input type="radio"/>         | <input type="radio"/> |

44. 43. Please indicate how often you purchased the following shrimp/prawns at present? \*

*Mark only one oval per row.*

|                                                                            | Regularly<br>(every week) | Occasionally<br>(every month) | Rarely (special<br>occasions) | Never                 |
|----------------------------------------------------------------------------|---------------------------|-------------------------------|-------------------------------|-----------------------|
| Other saltwater finfish<br>(For example - Vhetki,<br>Parshe etc.)          | <input type="radio"/>     | <input type="radio"/>         | <input type="radio"/>         | <input type="radio"/> |
| Other freshwater finfish<br>(For example - Pangus,<br>Tilapia, Carps etc.) | <input type="radio"/>     | <input type="radio"/>         | <input type="radio"/>         | <input type="radio"/> |
| Bagda (Shrimp)                                                             | <input type="radio"/>     | <input type="radio"/>         | <input type="radio"/>         | <input type="radio"/> |
| Golda (Prawn)                                                              | <input type="radio"/>     | <input type="radio"/>         | <input type="radio"/>         | <input type="radio"/> |



45. 44. What was the price (Taka - BDT) you paid for per kg of other saltwater fish (For example - Vhetki, Parshe etc.) before COVID? \*

---

---

---

---

---

46. 45. What was the price (Taka - BDT) you paid for per kg of other saltwater fish (For example - Vhetki, Parshe etc.) after COVID? \*

---

---

---

---

---

47. 46. What was the price (Taka - BDT) you paid for per kg of other freshwater fish (For example - Pangas, Tilapia, Carps etc.) before COVID? \*

---

---

---

---

---

48. 47. What was the price (Taka - BDT) you paid for per kg of other freshwater fish (For example - Pangas, Tilapia, Carps etc.) after COVID? \*

---

---

---

---

---

49. 48. What was the price (Taka - BDT) you paid for per kg of Bagda (Shrimp) before COVID? \*

---

50. 49. What was the price (Taka - BDT) you paid for per kg of Bagda (Shrimp) after COVID? \*

---

51. 50. What was the price (Taka - BDT) you paid for per kg of Golda (Prawn) before COVID? \*

---

52. 51. What was the price (Taka - BDT) you paid for per kg of Golda (Prawn) after COVID? \*

---

Visit the fish market

53. 52. How often did you visit the fish market before COVID? \*

*Mark only one oval.*

- I rarely visited the fish market
- Everyday
- 3 to 5 days per week
- 2 to 3 days per week
- 1 day every week
- Less than 1 day per week on average

54. 53. How often did you visit the fish market after COVID? \*

*Mark only one oval.*

- I rarely visited the fish market
- Everyday
- 3 to 5 days per week
- 2 to 3 days per week
- 1 day every week
- Less than 1 day per week on average

55. 54. If your pattern of visiting the fish market has changed please give the reasons. \*

*Mark only one oval.*

- My visits have not changed
- I visit the fish market less often due to financial difficulty
- I visit the fish market more often due to financial difficulty
- I visit the fish market less often due to fear of catching COVID
- I visit the fish market more often to buy food for more vulnerable people as well
- Other: \_\_\_\_\_

56. 55. If you choose "other" option in the previous question please explain it here

---

---

---

---

---

Open comment box

57. 56. Do you have any other comments about your consumption of fish before and after Covid19?

---

---

---

---

---

---

This content is neither created nor endorsed by Google.

Google Forms
